# Supplementary material
Source: PubMed Central journal article supplement (PMC5117687)

**A** SSDS hotspots with or without overlapping SPO11-oligo hotspot:

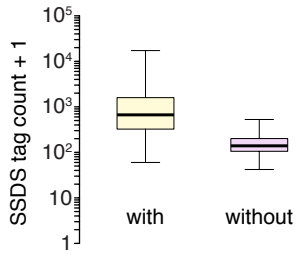

**B** SSDS hotspots with or without overlapping SPO11-oligo hotspot:

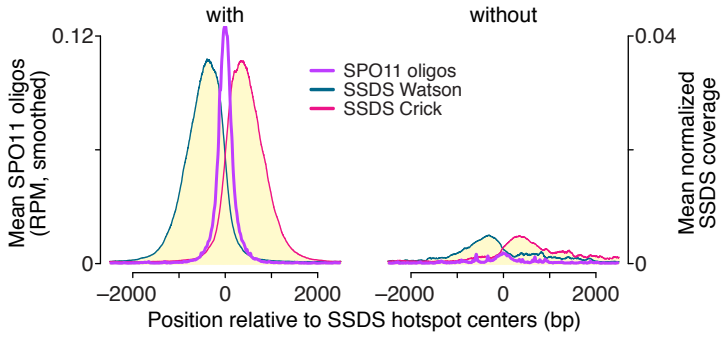

**C** SSDS coverage around: SSDS hotspots and SPO11-oligo hotspots

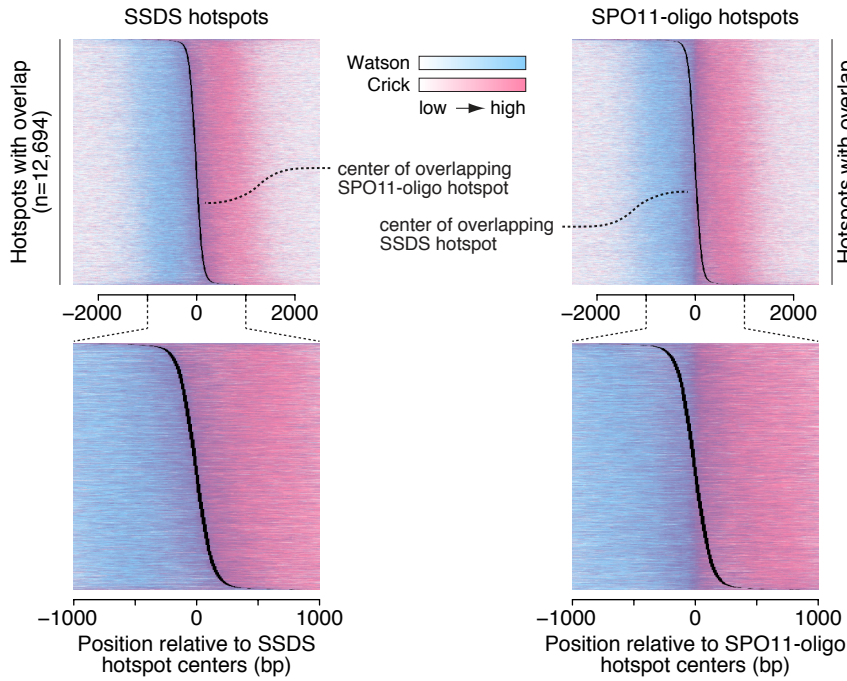

**D** Density plots of Mean SPO11 oligos (RPM, smoothed) and Mean normalized SSDS coverage around blurred SPO11-oligo hotspot centers.

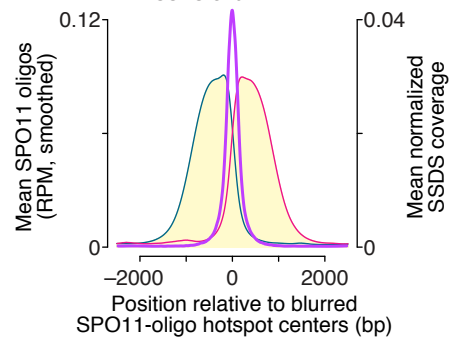

**E** Density plots of Mean SPO11 oligos (RPM, smoothed) and Mean normalized SSDS coverage around SPO11-oligo hotspot centers.

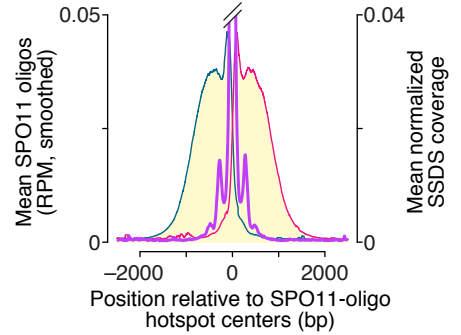

**F** SPO11 oligos (RPM) that are: Unique, Imputed, multi

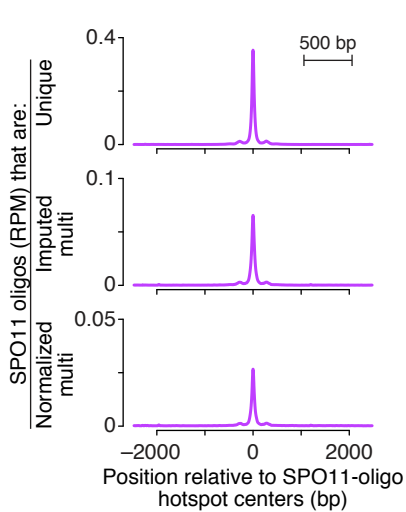

**G** Cumulative fraction of SPO11 oligos in 5001 bp around all hotspots

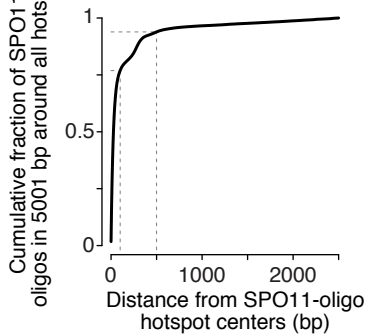

**H** Fraction of SPO11 oligos within window (% , smoothed) for mouse and S. cerevisiae

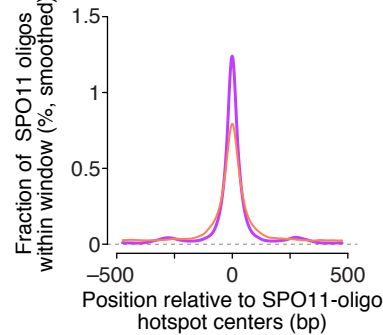

Supplement: NIHMS819055-supplement-2.pdf [file NIHMS819055-supplement-2.pdf]
