# Supplementary material
Source: PubMed Central journal article supplement (PMC5117687)
Supplement: NIHMS819055-supplement-8.pdf [file NIHMS819055-supplement-8.pdf]

**Table S1. Mapping statistics for SPO11-oligo reads, Related to STAR Methods****Table S1A. Mapping statistics for SPO11-oligo reads in five datasets**

| Dataset           | Total     | Nuclear genome |                    |           | chrM   |                    |       |
|-------------------|-----------|----------------|--------------------|-----------|--------|--------------------|-------|
|                   |           | Unique         | Multi <sup>1</sup> | Total     | Unique | Multi <sup>1</sup> | Total |
| B6                | 69417156  | 46615259       | 22798301           | 69413560  | 1978   | 1618               | 3596  |
| <i>Atm</i> wt     | 57341378  | 36776157       | 20560672           | 57336829  | 2966   | 1583               | 4549  |
| <i>Atm</i> het    | 87651414  | 60824069       | 26814262           | 87638331  | 7979   | 5104               | 13083 |
| <i>Atm</i> null 1 | 112091499 | 87894761       | 24191046           | 112085807 | 2917   | 2775               | 5692  |
| <i>Atm</i> null 2 | 68732743  | 57582583       | 11144707           | 68727290  | 3602   | 1851               | 5453  |

<sup>1</sup> Multi counts are after imputation.

**Table S1B. Mapping statistics for shortened SPO11-oligo reads in three datasets**

| Dataset           | Total   | Nuclear genome |                    |         | chrM   |                    |       |
|-------------------|---------|----------------|--------------------|---------|--------|--------------------|-------|
|                   |         | Unique         | Multi <sup>1</sup> | Total   | Unique | Multi <sup>1</sup> | Total |
| <i>Atm</i> wt     | 2752725 | 1855712        | 896836             | 2752548 | 122    | 55                 | 177   |
| <i>Atm</i> null 1 | 5410887 | 3286639        | 2124064            | 5410703 | 103    | 81                 | 184   |
| <i>Atm</i> null 2 | 3670695 | 2233626        | 1436799            | 3670425 | 158    | 112                | 270   |

<sup>1</sup> Multi counts are after normalization.

**Table S2. Crossover hotspots identified by pedigree analysis or by sperm typing, Related to Figures 1D, S1B, 6 and S6**

**Table S2A. Four crossover hotspots on chromosome 1, A1–A4, previously delineated by pedigree analysis**

Four hotspots on chromosome 1 were previously defined by pedigree analysis in crosses involving haplotypes from C57BL/6 (“B6”), C3H/HeJ (“C3H”), SPRET/EiJ (“SPRET”) and CAST/EiJ (“CAST”) strains (Kelmenson et al., 2005).

| Hotspot         | Start marker <sup>1</sup> | End marker <sup>1</sup> | Coordinates in genome assembly GRCm38/mm10 (bp) |           |        |                                  |           |        |
|-----------------|---------------------------|-------------------------|-------------------------------------------------|-----------|--------|----------------------------------|-----------|--------|
|                 |                           |                         | Crossover hotspot <sup>1</sup>                  |           |        | SPO11-oligo hotspot <sup>2</sup> |           |        |
|                 |                           |                         | Start                                           | End       | Length | Start                            | End       | Length |
| A1              | D1Pgn9                    | D1Pgn10                 | 159980411                                       | 159984488 | 4078   | 159983887                        | 159983964 | 78     |
| A2              | D1Pgn6                    | D1Pgn13                 | 160000209                                       | 160020166 | 19958  | 160014582                        | 160014614 | 33     |
| A3              | D1Pgn14                   | D1Pgn15                 | 160025001                                       | 160026084 | 1084   | 160025419                        | 160026167 | 749    |
| A4 <sup>3</sup> | D1Pgn11                   | D1Pgn12                 | 160058414                                       | 160081429 | 23016  | 160063421                        | 160063583 | 163    |
|                 |                           |                         |                                                 |           |        | 160079882                        | 160080548 | 667    |

<sup>1</sup> Polymorphic markers are reported in Kelmenson et al., 2005. Start marker and End marker define crossover hotspot Start position and End position, respectively. For microsatellite polymorphisms D1Pgn6, D1Pgn9, D1Pgn10, D1Pgn11 and D1Pgn12, coordinates are determined by the 3' position of the DNA segment of the marker, as compiled in <http://www.informatics.jax.org>. For SNPs D1Pgn13, D1Pgn14 and D1Pgn15, coordinates refer to the specific position of the SNP.

<sup>2</sup> SPO11-oligo hotspot coordinates reflect the Start and End in **Table S3A**.

<sup>3</sup> A4 delineated by pedigree analysis encompasses two distinct SPO11-oligo hotspots.

**Table S2 continued. Crossover hotspots identified by pedigree analysis or by sperm typing, Related to Figures 1D, S1B, 6 and S6**

**Table S2B. Crossover hotspots previously delineated by sperm typing**

In the literature we identified 16 crossover hotspots previously defined by fine-scale analysis of crossover products in sperm isolated from F<sub>1</sub> hybrids of crosses between C57BL/6J (“B6”) and either A/J, C3H/HeJ (“C3H”) or DBA/2J (“DBA”) (Kauppi et al., 2007; Bois, 2007; Wu et al., 2010; Getun et al., 2010; Cole et al., 2010; Getun et al., 2012; de Boer et al., 2015). See **Figure S6** for SPO11-oligo maps, SSDS maps, crossover rates, and noncrossover conversion frequencies in 5001-bp windows around these hotspots.

| Hotspot       | F <sub>1</sub> Hybrid | Reference            | Coordinates in genome assembly GRCm38/mm10 (bp) |           |        |                                  |           |        |
|---------------|-----------------------|----------------------|-------------------------------------------------|-----------|--------|----------------------------------|-----------|--------|
|               |                       |                      | Crossover hotspot <sup>1</sup>                  |           |        | SPO11-oligo hotspot <sup>2</sup> |           |        |
|               |                       |                      | Start                                           | End       | Length | Start                            | End       | Length |
| Chromosome 1  |                       |                      |                                                 |           |        |                                  |           |        |
| central       | B6×A/J                | de Boer et al., 2015 | 78589841                                        | 78591616  | 1776   | 78590834                         | 78591048  | 215    |
| <i>M1</i>     | B6×C3H                | Kauppi et al., 2007  | 143875788                                       | 143878121 | 2334   | 143877042                        | 143877098 | 57     |
| <i>A3</i>     | B6×DBA                | Cole et al., 2010    | 160024019                                       | 160027342 | 3324   | 160025419                        | 160026167 | 749    |
| distal        | B6×A/J                | de Boer et al., 2015 | 185265802                                       | 185268500 | 2699   | 185266572                        | 185267584 | 1013   |
| Chromosome 19 |                       |                      |                                                 |           |        |                                  |           |        |
| <i>HS9</i>    | B6×DBA                | Bois 2007            | 10668187                                        | 10670548  | 2362   | 10669828                         | 10670359  | 532    |
| <i>HS14.9</i> | B6×DBA                | Wu et al., 2010      | 14882384                                        | 14885235  | 2852   | 14883732                         | 14884165  | 434    |
| <i>HS18.2</i> | B6×DBA                | Wu et al., 2010      | 18146103                                        | 18147531  | 1429   | no hotspot by SPO11 oligos       |           |        |
| <i>HS22</i>   | B6×DBA                | Bois 2007            | 22960142                                        | 22962712  | 2571   | 22961596                         | 22962032  | 437    |
| <i>HS23.9</i> | B6×DBA                | Wu et al., 2010      | 23841534                                        | 23843074  | 1541   | 23842467                         | 23842554  | 88     |
| <i>HS37</i>   | B6×DBA                | Bois 2007            | 38677802                                        | 38679593  | 1792   | 38678165                         | 38678322  | 158    |
| <i>HS44.2</i> | B6×DBA                | Wu et al., 2010      | 44148565                                        | 44151078  | 2514   | 44148684                         | 44150891  | 2208   |
| <i>HS48.3</i> | B6×DBA                | Wu et al., 2010      | 48213103                                        | 48216187  | 3085   | 48214759                         | 48215364  | 606    |
| <i>HS59.4</i> | B6×DBA                | Getun et al., 2010   | 59346779                                        | 59350838  | 4060   | 59349650                         | 59350010  | 361    |
| <i>HS59.5</i> | B6×DBA                | Getun et al., 2012   | 59442354                                        | 59443805  | 1452   | 59442410                         | 59443524  | 1115   |
| <i>HS61.1</i> | B6×DBA                | Wu et al., 2010      | 61011233                                        | 61013223  | 1991   | 61012247                         | 61012974  | 728    |
| <i>HS61.2</i> | B6×DBA                | Wu et al., 2010      | 61152469                                        | 61154630  | 2162   | 61152931                         | 61153866  | 936    |

<sup>1</sup> Except for *HS9*, crossover hotspot coordinates are determined by SNPs that encompass all mapped crossovers (Kauppi et al., 2007; Bois, 2007; Wu et al., 2010; Getun et al., 2010; Cole et al., 2010; Getun et al., 2012; de Boer et al., 2015). For *HS9*, crossover hotspot coordinates are determined by 3' positions of internal B6-specific primers used for crossover detection (*HS9-B-2F* and *HS-9-3R* in Bois, 2007).

<sup>2</sup> SPO11-oligo hotspot coordinates reflect the Start and End in **Table S3A**.

**Table S5. Data underlying chromosome-scale analyses, Related to Figure 4**

| Chromosome   | Chromosome size (bp) <sup>1</sup> | SPO11 oligos (RPM) <sup>2</sup> | SPO11-oligo density (RPM/Mb) | Crossover rate (cM) <sup>3,4</sup> |
|--------------|-----------------------------------|---------------------------------|------------------------------|------------------------------------|
| chr1         | 191909192                         | 69606                           | 363                          | 76.2                               |
| chr2         | 178326651                         | 73115                           | 410                          | 77.7                               |
| chr3         | 156398855                         | 53878                           | 344                          | 63.1                               |
| chr4         | 152055611                         | 60332                           | 397                          | 70.1                               |
| chr5         | 147919674                         | 62217                           | 421                          | 72.0                               |
| chr6         | 146336543                         | 52717                           | 360                          | 59.7                               |
| chr7         | 141855407                         | 52687                           | 371                          | 68.1                               |
| chr8         | 125611432                         | 50769                           | 404                          | 60.7                               |
| chr9         | 121157018                         | 50618                           | 418                          | 55.7                               |
| chr10        | 127067662                         | 49930                           | 393                          | 61.7                               |
| chr11        | 118745945                         | 55509                           | 467                          | 69.9                               |
| chr12        | 116922420                         | 45270                           | 387                          | 54.6                               |
| chr13        | 117121193                         | 46151                           | 394                          | 51.4                               |
| chr14        | 121442110                         | 44188                           | 364                          | 53.2                               |
| chr15        | 100653315                         | 40639                           | 404                          | 49.5                               |
| chr16        | 95019758                          | 37055                           | 390                          | 50.0                               |
| chr17        | 91707462                          | 39641                           | 432                          | 50.9                               |
| chr18        | 87452634                          | 34544                           | 395                          | 50.9                               |
| chr19        | 58205856                          | 25629                           | 440                          | 50.0                               |
| non-PAR chrX | 163326463                         | 36779                           | 225                          | NA                                 |
| non-PAR chrY | 88110223                          | 9345                            | 106                          | NA                                 |
| PAR          | 176007                            | 7312                            | 41546                        | 50.0                               |

<sup>1</sup> Sequence gaps were subtracted from GRCm38/mm10 chromosome lengths.

<sup>2</sup> Counts only include SPO11 oligos mapping to each fully assembled chromosome contig (i.e., do not include SPO11 oligos mapping to unplaced or unassigned contigs).

<sup>3</sup> Autosomal crossover rates using crossover marker MLH1 were reported in Froenicke et al., 2002.

<sup>4</sup> Crossover rate in the PAR was set at 50 cM.
