# Supplementary material
Source: PubMed Central journal article supplement (PMC5117687)

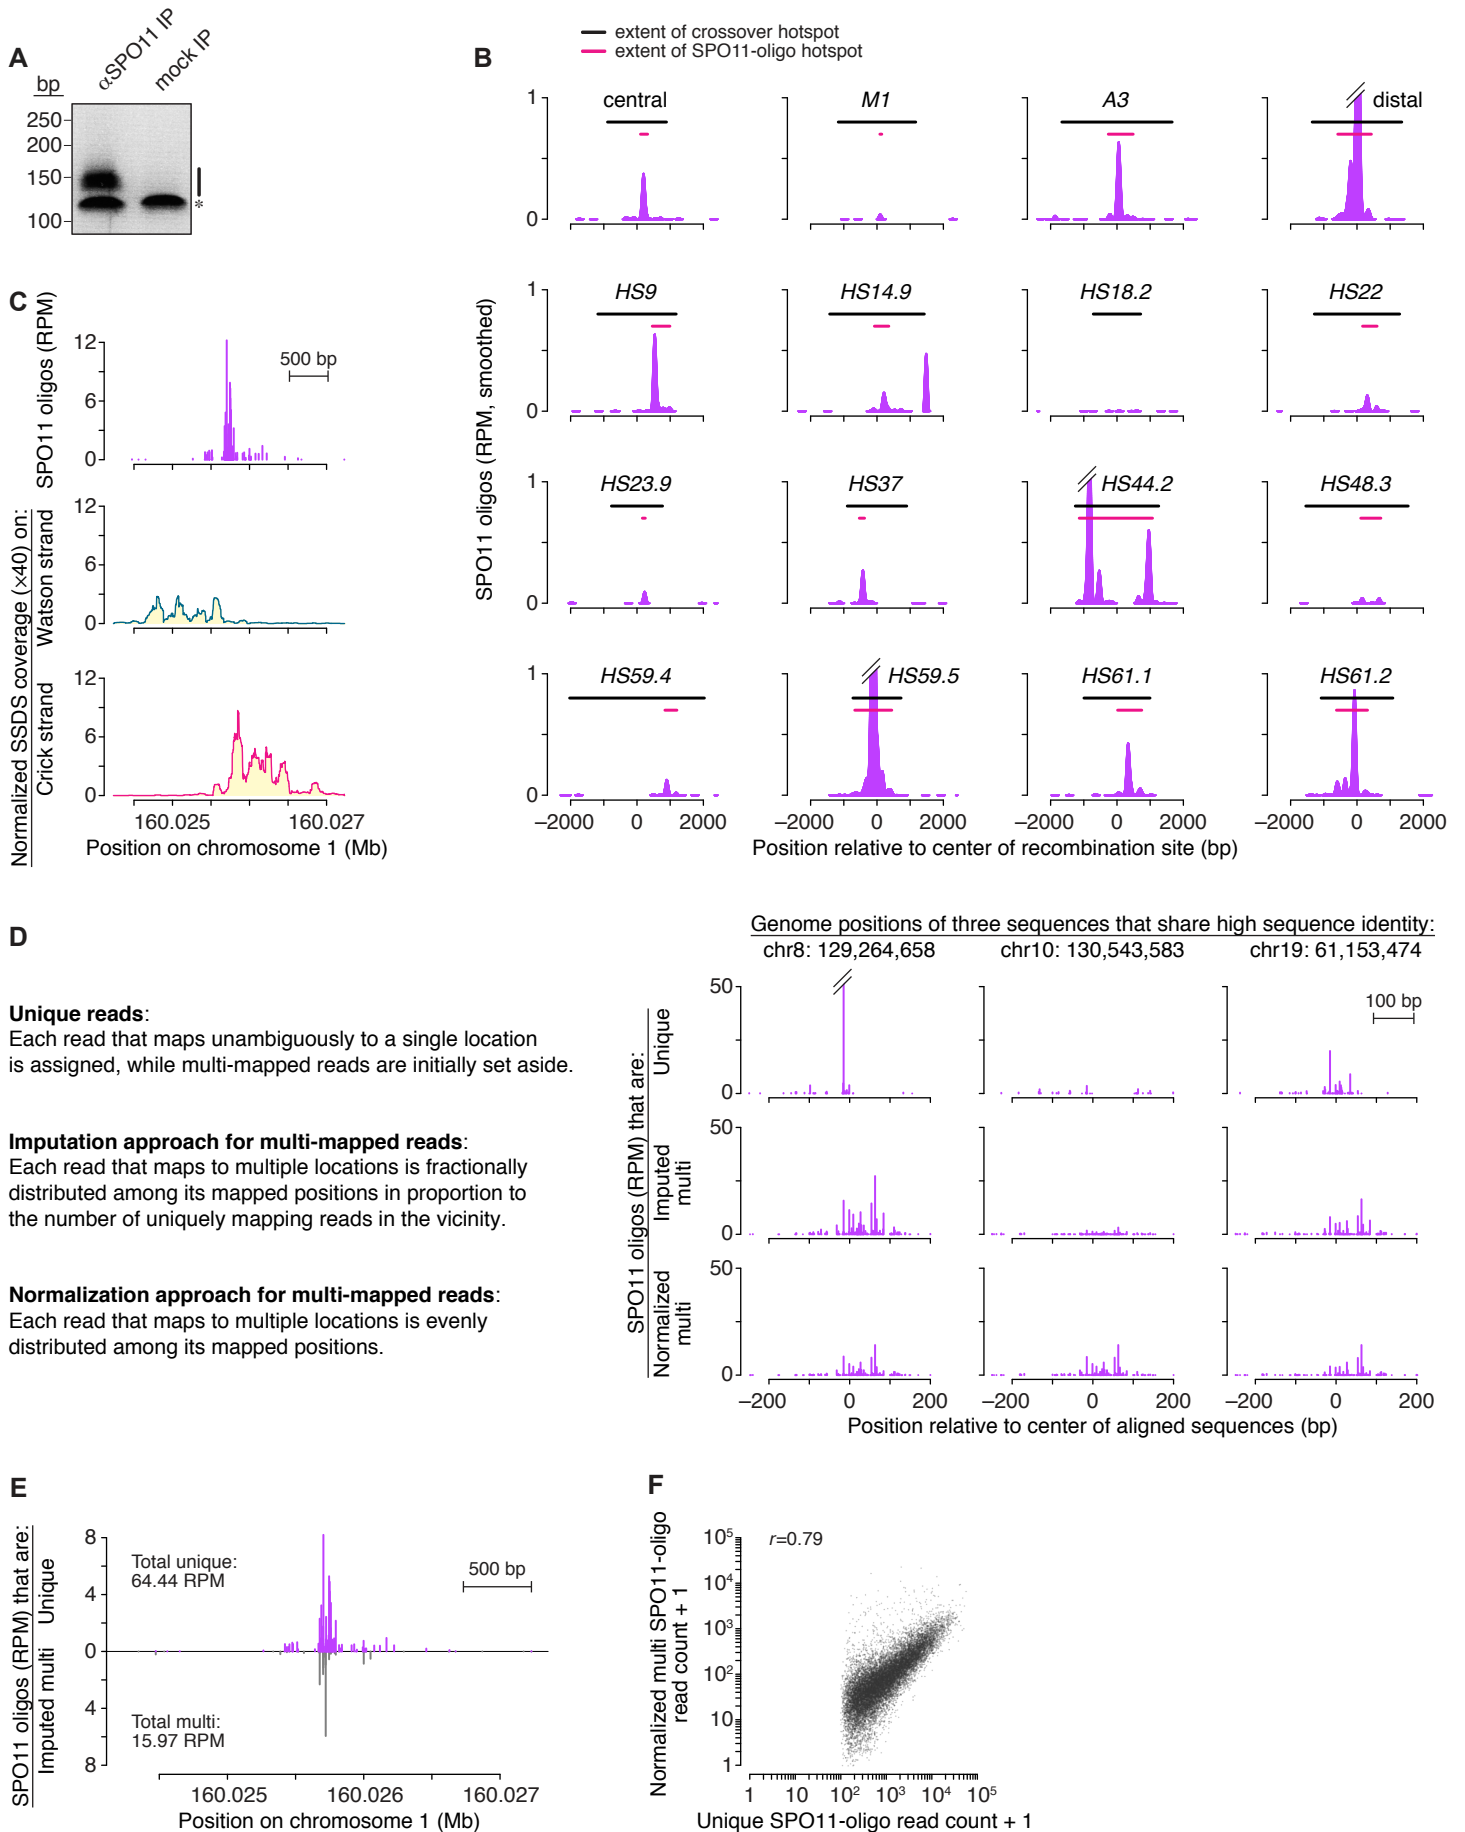

Supplement: NIHMS819055-supplement-1.pdf [file NIHMS819055-supplement-1.pdf]

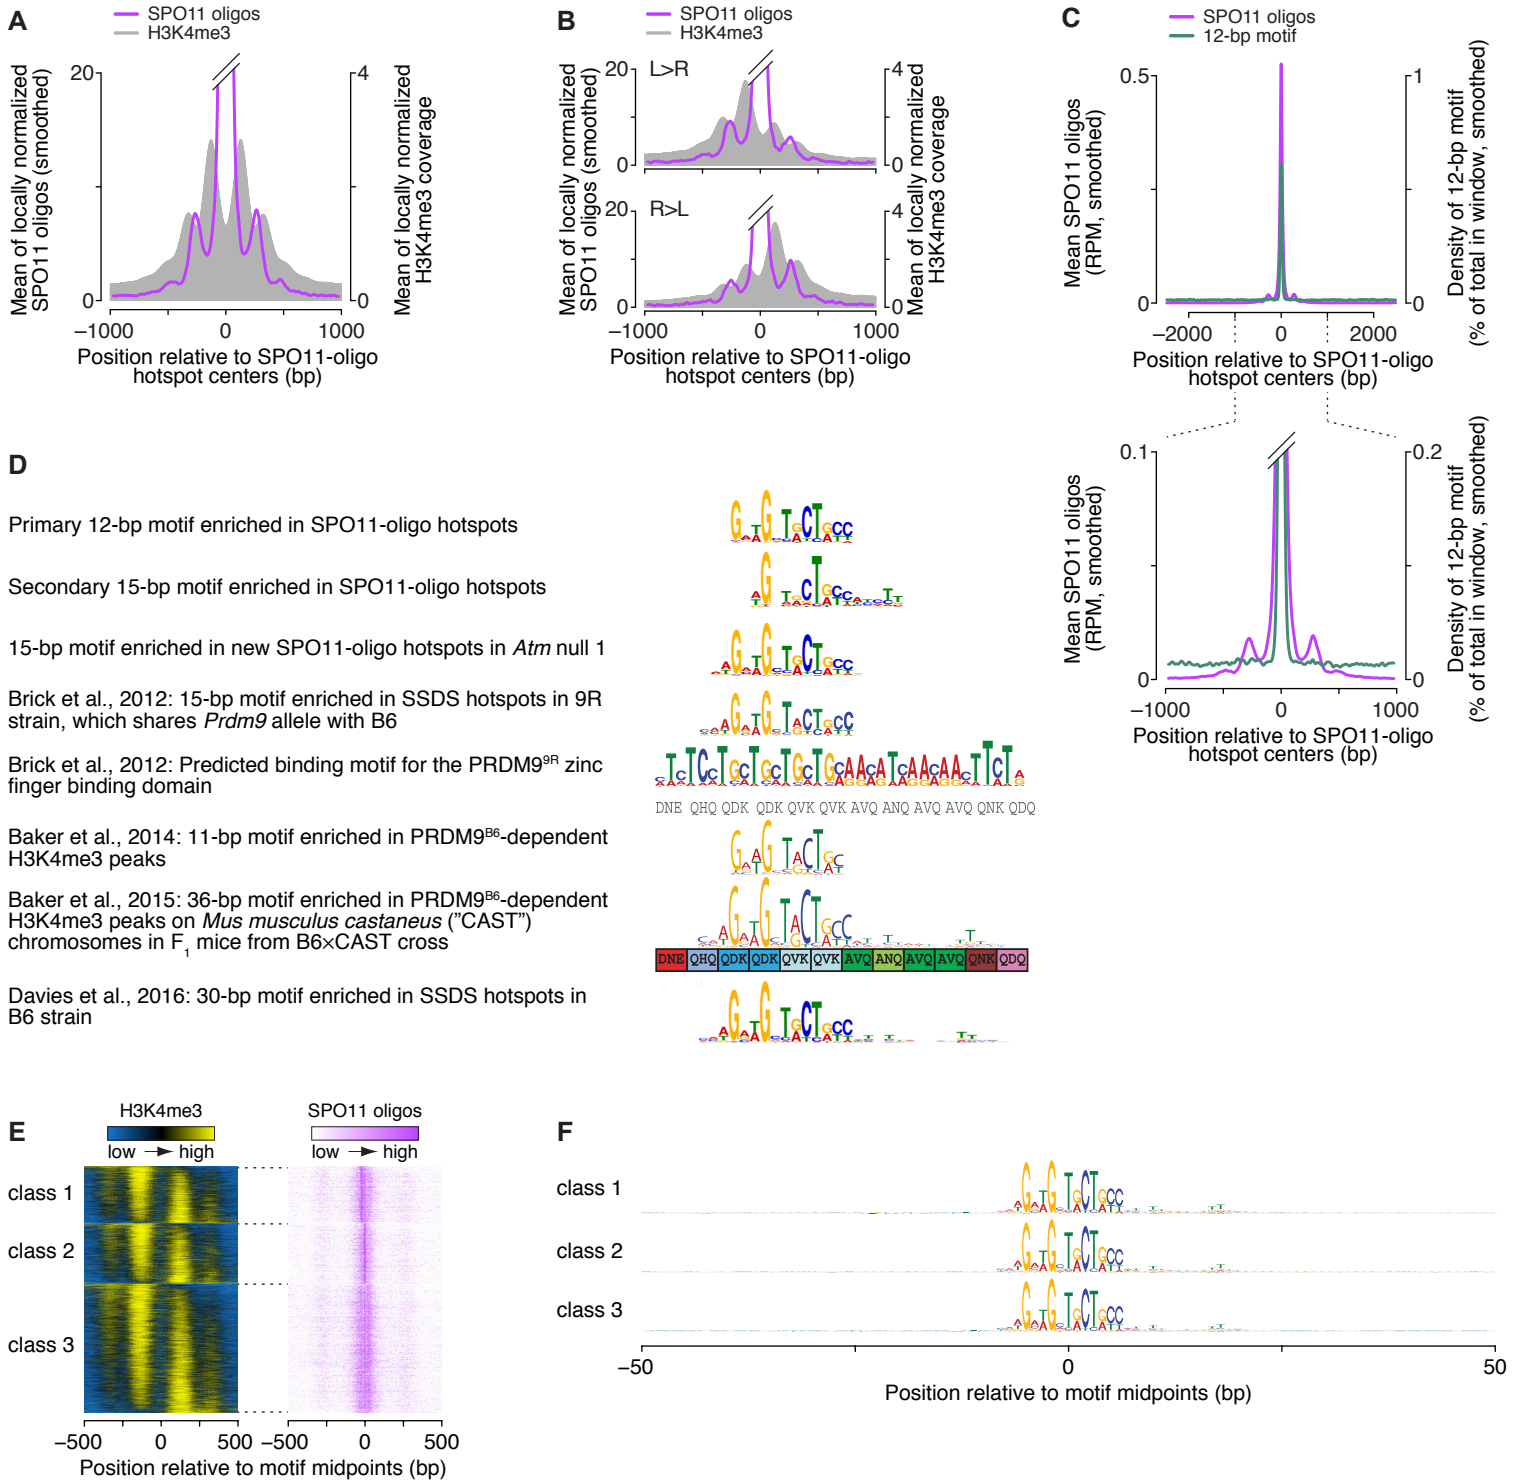

Supplement: NIHMS819055-supplement-3.pdf [file NIHMS819055-supplement-3.pdf]

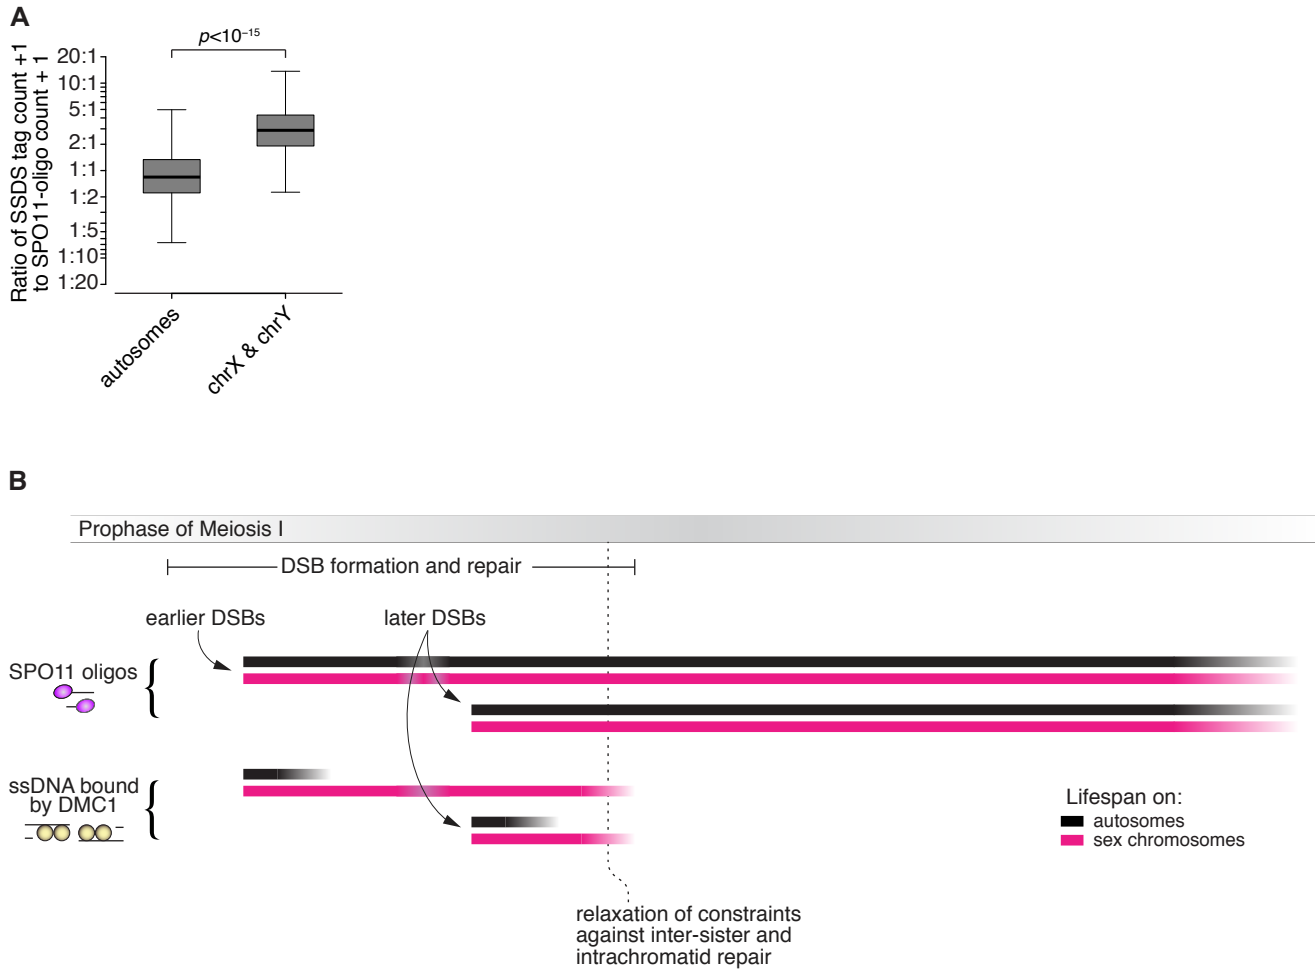

Supplement: NIHMS819055-supplement-4.pdf [file NIHMS819055-supplement-4.pdf]

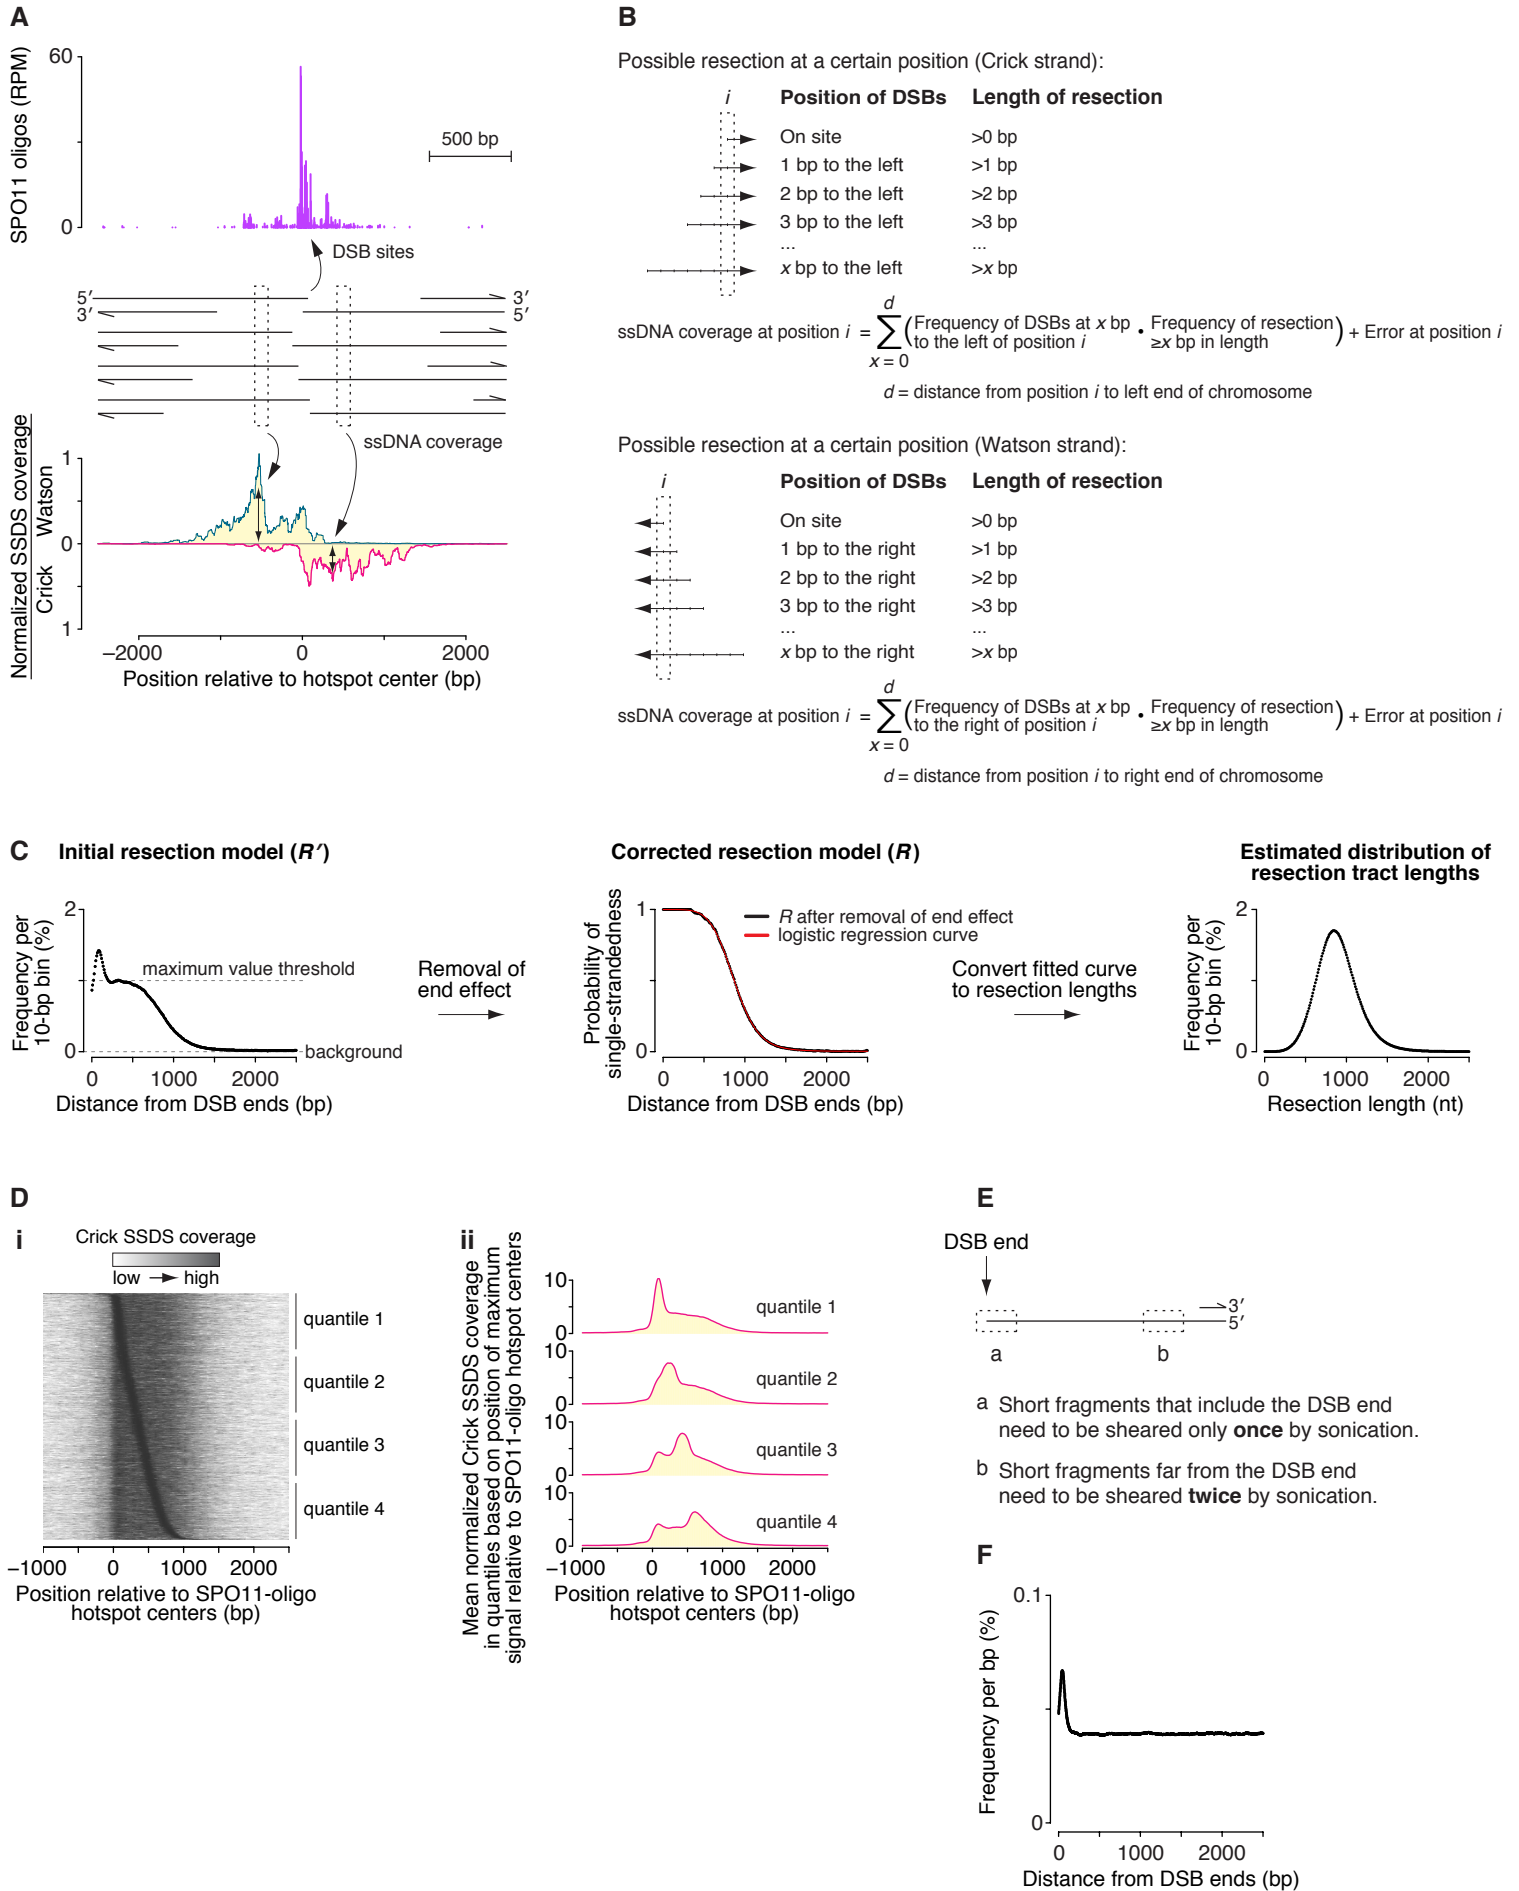

Supplement: NIHMS819055-supplement-5.pdf [file NIHMS819055-supplement-5.pdf]

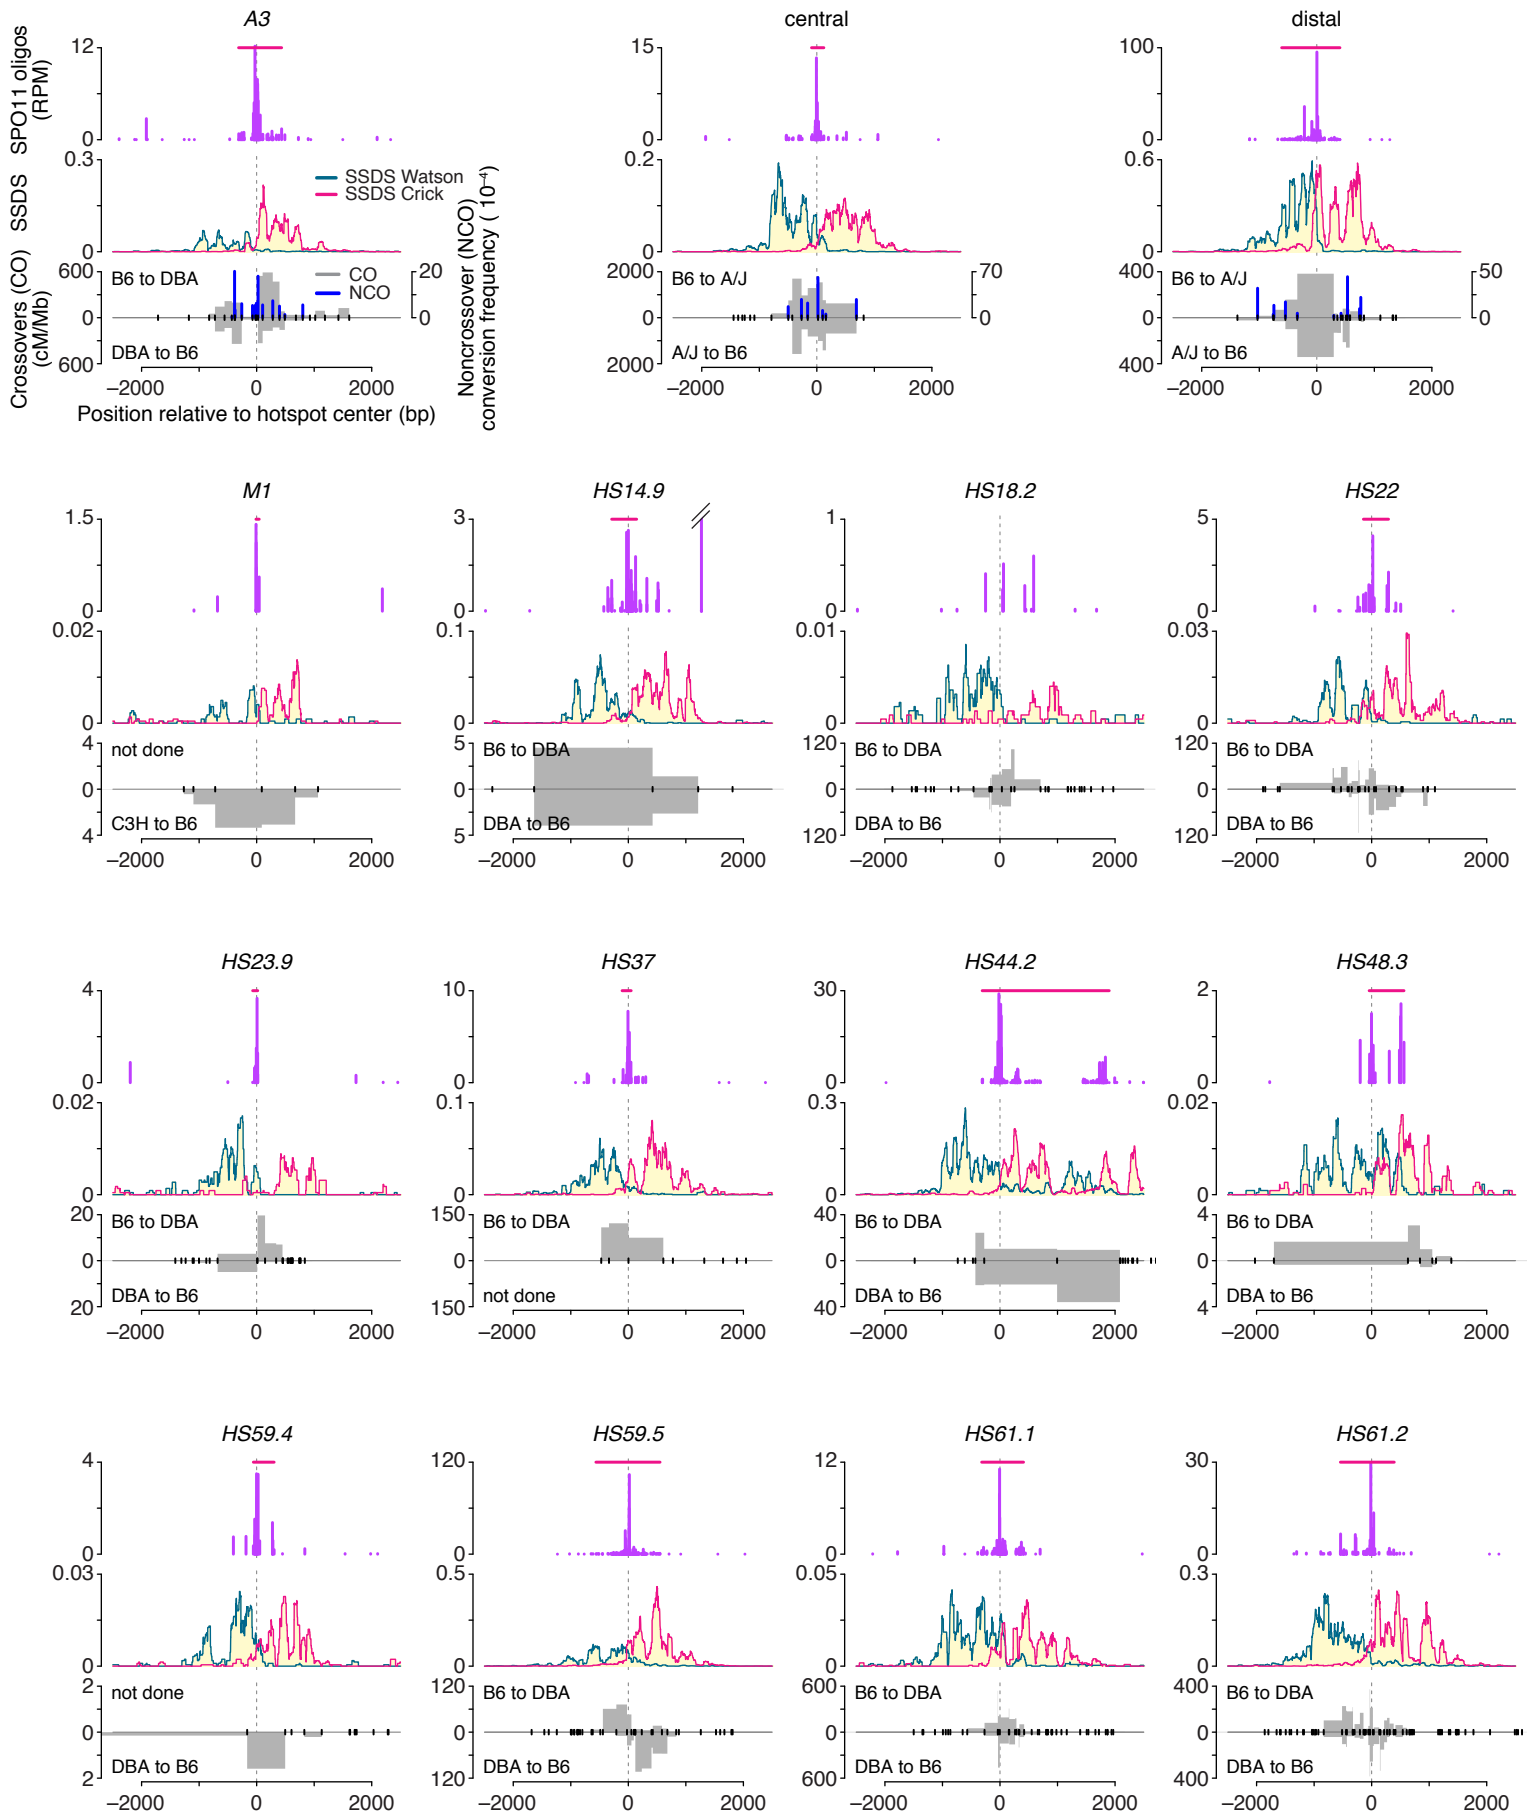

Supplement: NIHMS819055-supplement-6.pdf [file NIHMS819055-supplement-6.pdf]

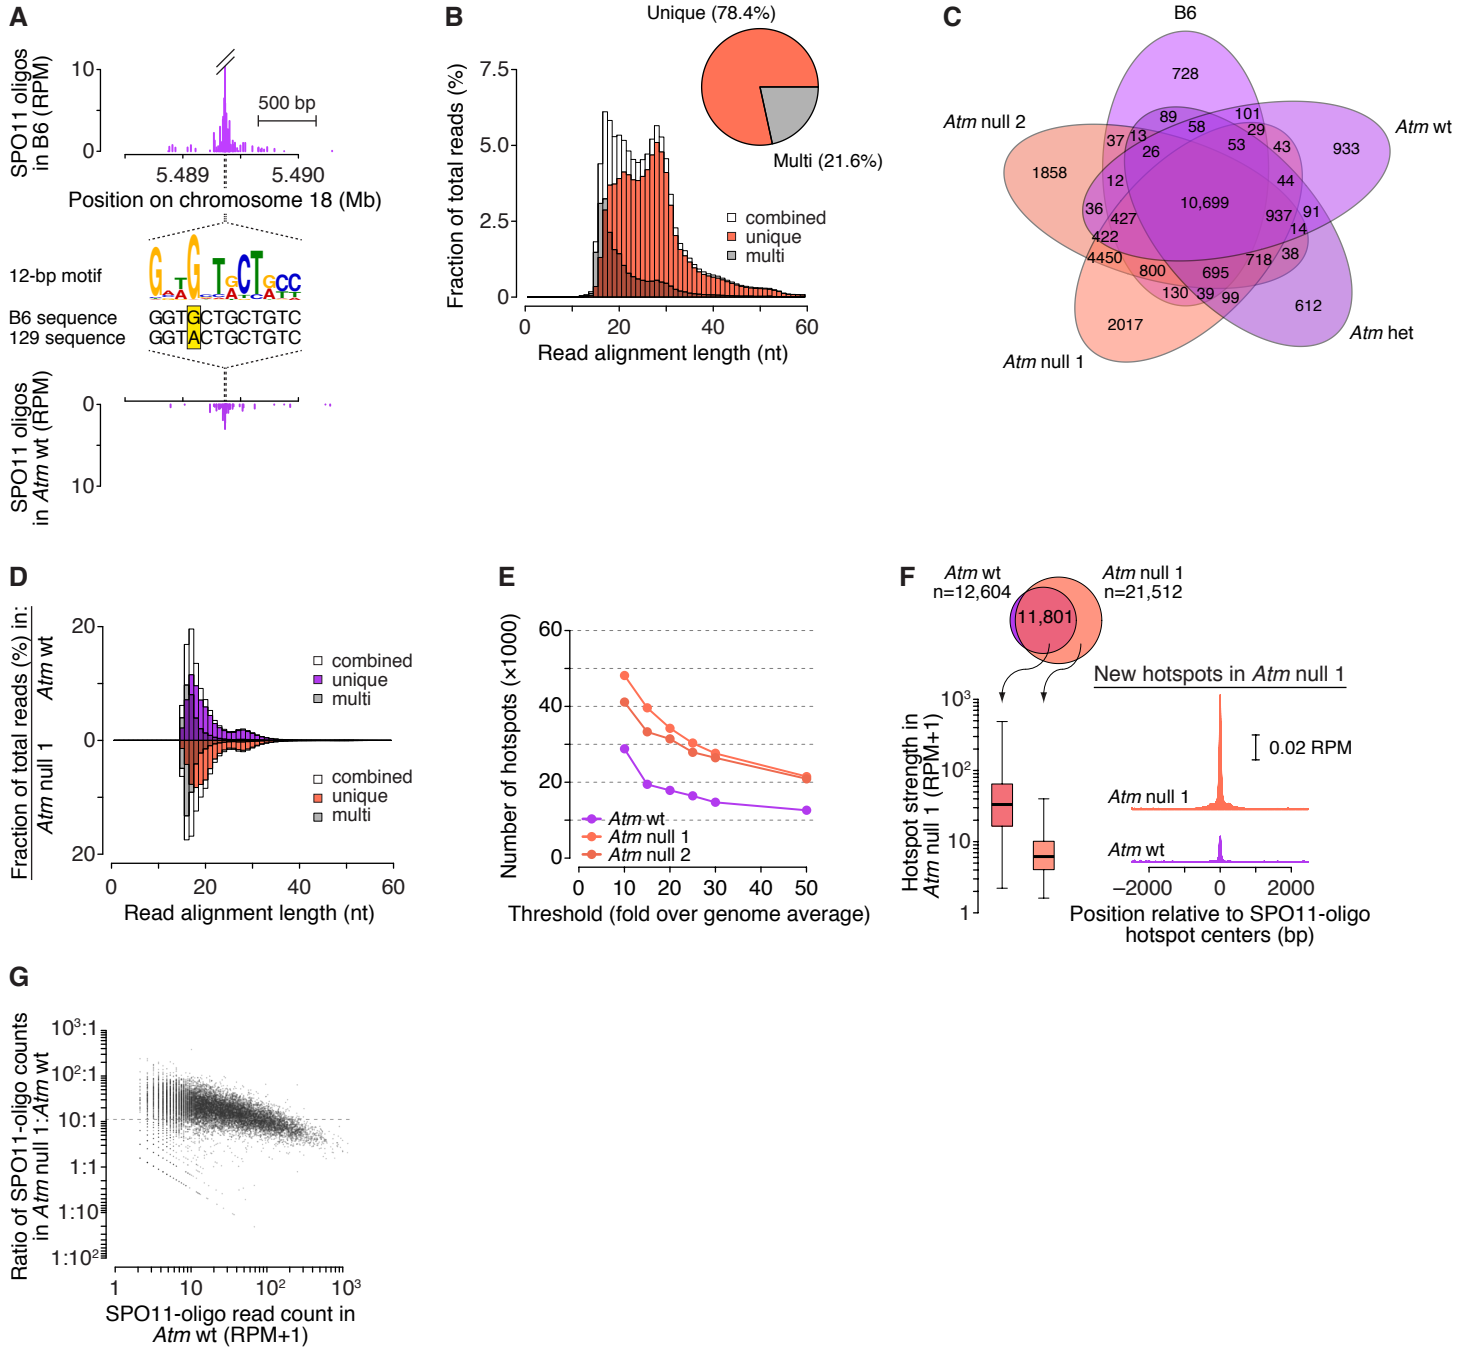

Supplement: NIHMS819055-supplement-7.pdf [file NIHMS819055-supplement-7.pdf]
